# Supplementary material for: A bibliometric and scientific knowledge-map study of the chimeric antigen receptor (CAR) natural killer (NK) cell-related research from 2010 to 2022
Source: PubMed Central journal article supplement (PMC9413055; doi:10.3389/fimmu.2022.969196), 2022-08-12
Supplement: DataSheet_1.pdf [file DataSheet_1.pdf]

### **The retrieval formula of this study:**

TS = (CAR-NK OR CAR-NK cell OR CAR NK cell OR CAR-engineered NK cell OR CAR-expressing NK cell OR CAR-transduced natural killer cell OR CAR-expressing natural killer cell OR chimeric antigen receptor natural killer-cell OR chimeric antigen receptor-expressing NK cell OR chimeric antigen receptor-transduced natural killer cell OR chimeric antigen receptor-engineered NK cell OR chimeric antigen receptor (CAR)-engineered NK cell OR chimeric antigen receptor (CAR)-transduced natural killer cell).

Inclusion criteria were as follows:

- (1) timespan: January 1, 2010 to May 1, 2022;
- (2) language: English;
- (3) publication type: article or review.

Since the bibliometric analysis required collecting as much relevant literature as possible, the Exclusion criteria were set rather broadly, as follows:

- (1) language: non-English;
- (2) publication type: non-article or non-review.

These retrieved documents were exported in the form of “Full Record and Cited References” and saved as “Plain Text”. Finally, these files were named “download\_\*.txt”.
